# Supplementary material
Source: Springer Nature journal article supplement (https://www.springermedizin.de/resource/supplementary/12911_2013_752_MOESM3_ESM.pdf/9526600)
Supplement: MOESM3 [file 9526600]

**Table S2: Characteristics of Values Clarification Methods and of The Studies in Which They were Presented**

| Topic                                                          | N (%)                       |
|----------------------------------------------------------------|-----------------------------|
| <b>Characteristics of Studies in which VCMs were Presented</b> |                             |
|                                                                |                             |
| <b>Decision context</b>                                        | <b>Overlapping (Note 1)</b> |
| Treatment                                                      | 28 (46%)                    |
| Prevention                                                     | 15 (25%)                    |
| Screening (non-genetic)                                        | 20 (33%)                    |
| Genetic testing                                                | 6 (10%)                     |
|                                                                |                             |
| <b>Medium</b>                                                  | <b>Overlapping (Note 2)</b> |
| Computer-based                                                 | 23 (38%)                    |
| Online/Web                                                     | 9 (15%)                     |
| CD-ROM                                                         | 1 (2%)                      |
| With Multimedia                                                | 8 (13%)                     |
| Audio                                                          | 3 (5%)                      |
| Video                                                          | 6 (10%)                     |
| Other                                                          | 2 (3%)                      |
| Decision board                                                 | 1 (2%)                      |
| Paper                                                          | 30 (49%)                    |
| With Audiotape                                                 | 5 (8%)                      |
| With Verbal component                                          | 5 (8%)                      |
| Verbal                                                         | 9 (15%)                     |
| With Visual Aids                                               | 6 (10%)                     |
| With Paper Exercises                                           | 1 (2%)                      |
| With Personal Data Assistant                                   | 1 (2%)                      |
|                                                                |                             |
| <b>Position in larger decision support tool</b>                |                             |
| After information section                                      | 52 (85%)                    |
| Before information section                                     | 2 (3%)                      |
| Between information sections                                   | 1 (2%)                      |
| Throughout: As add-on to DA                                    | 3 (5%)                      |
| Throughout: VCE formed the entirety of the tool                | 3 (5%)                      |
| Unclear from article                                           | 1 (2%)                      |
|                                                                |                             |
| <b>Decision intentions</b>                                     |                             |
| Asked which way leaning                                        | 21 (34%)                    |
| Asked which decision taken                                     | 17 (28%)                    |
| Not asked                                                      | 23 (38%)                    |

| <b>Characteristics Influencing the Design of the VCM</b>             |                                                               |
|----------------------------------------------------------------------|---------------------------------------------------------------|
| <b>Theory, framework, model, or mechanism</b>                        |                                                               |
| None                                                                 | 15 (25%)                                                      |
| <i>Underlying the VCM</i>                                            |                                                               |
| Expected utility theory                                              | 11 (18%)                                                      |
| Conjoint Analysis                                                    | 1 (2%)                                                        |
| Differentiation and Consolidation Theory                             | 2 (3%)                                                        |
| Multiattribute Utility Theory                                        | 2 (3%)                                                        |
| Other                                                                | 6 (10%)                                                       |
| <i>Underlying overall decision support tool</i>                      |                                                               |
| Ottawa Decision Support Framework (ODSF)                             | 19 (31%)                                                      |
| Precaution Adoption Model                                            | 3 (5%)                                                        |
| Edutainment Decision Aid Model (EDAM)                                | 2 (3%)                                                        |
| Elaboration Likelihood Model                                         | 2 (3%)                                                        |
| Stages of Change                                                     | 2 (3%)                                                        |
| Other                                                                | 11 (18%)                                                      |
| <b>Development of the VCM</b>                                        |                                                               |
| <b>Development process described in article</b>                      |                                                               |
| Yes                                                                  | 45 (74%)                                                      |
| No                                                                   | 16 (26%)                                                      |
| <b>Development: What aspect of development process was described</b> | <i>N.B.: Percentages out of 45 articles with descriptions</i> |
| Literature review                                                    | 19 (42%)                                                      |
| Modification, adaptation, translation of tool                        | 5 (11%)                                                       |
| Model validation                                                     | 2 (4%)                                                        |
| Needs assessment                                                     | 9 (20%)                                                       |
| Observation of existing processes                                    | 1 (2%)                                                        |
| Individual sessions, interviews                                      | 9 (20%)                                                       |
| Focus groups                                                         | 13 (29%)                                                      |
| Consultations, expert review                                         | 23 (51%)                                                      |
| Feasibility testing                                                  | 2 (4%)                                                        |
| Iterative process, iterative steps                                   | 9 (20%)                                                       |
| Prototype testing, usability testing, pilot testing                  | 36 (80%)                                                      |
| <b>Development: Who was involved in the development process</b>      | <i>N.B.: Percentages out of 45 articles with descriptions</i> |

|                                                                                                               |          |
|---------------------------------------------------------------------------------------------------------------|----------|
| Clinical experts, health care professionals                                                                   | 24 (53%) |
| Experts in counseling, patient education, patient advocates                                                   | 9 (20%)  |
| Experts from relevant academic fields (e.g., epidemiology, decision-making, health communication)             | 14 (31%) |
| Plain language experts                                                                                        | 3 (7%)   |
| Technical experts, design experts                                                                             | 2 (4%)   |
| Policymakers                                                                                                  | 1 (2%)   |
| Consumer representatives, people from community-based groups, advocacy groups                                 | 6 (13%)  |
| Patient experts (those who have previously faced decision)                                                    | 17 (38%) |
| Prospective users                                                                                             | 22 (49%) |
| Healthy volunteers, people recruited from community                                                           | 6 (13%)  |
| Patient advisory groups                                                                                       | 1 (2%)   |
| Committees, steering committees, advisory panels, multidisciplinary teams                                     | 6 (13%)  |
|                                                                                                               |          |
| <b>Guidelines used</b>                                                                                        |          |
| CREDIBLE                                                                                                      | 3 (5%)   |
| IPDAS                                                                                                         | 17 (28%) |
| IPDAS cited, but not used                                                                                     | 2 (3%)   |
| National Health and Medical Research Council guidelines for presenting information to consumers               | 2 (3%)   |
| American College of Physicians Guideline for counseling postmenopausal women about preventive hormone therapy | 1 (2%)   |
| None                                                                                                          | 37 (61%) |
|                                                                                                               |          |
| <b>Characteristics of the VCM</b>                                                                             |          |
|                                                                                                               |          |
| <b>Type of VCM</b>                                                                                            |          |
| Decision analysis                                                                                             | 11 (18%) |
| Conjoint analysis                                                                                             | 1 (2%)   |
| Analytic hierarchy process                                                                                    | 1 (2%)   |
| Tradeoffs                                                                                                     | 4 (7%)   |
| Probability                                                                                                   | 1 (2%)   |
| Time                                                                                                          | 1 (2%)   |
| Attributes                                                                                                    | 2 (3%)   |
| Pros vs. cons                                                                                                 | 28 (46%) |
| With weighting                                                                                                | 23 (38%) |

|                                                         |          |
|---------------------------------------------------------|----------|
| With binary response                                    | 4 (7%)   |
| Viewing or listing only                                 | 1 (2%)   |
| Prioritization                                          | 7 (11%)  |
| Rating scales                                           | 7 (11%)  |
| Lists of concerns                                       | 5 (8%)   |
| List only                                               | 2 (3%)   |
| List and discuss                                        | 3 (5%)   |
| Social matching                                         | 1 (2%)   |
| Other                                                   | 1 (2%)   |
|                                                         |          |
| <b>Presentation of results</b>                          |          |
| Yes                                                     | 24 (39%) |
| Yes, after decision intention                           | 3 (5%)   |
| Yes, prior to decision intention                        | 21 (34%) |
| Possibly shown explicitly (depends on options selected) | 1 (2%)   |
| No                                                      | 35 (57%) |
| No, not at all                                          | 10 (16%) |
| No, not explicitly, though it may be inferred           | 25 (41%) |
| Unclear from article                                    | 2 (3%)   |

\*This table was adapted with permission from Witteman et al.[1]

Note 1: Three VCEs address two decision contexts, one addresses three contexts, and one addresses all four.

Note 2: Two VCEs used two different media.

## References

- [1] Witteman H, Scherer L, Gavaruzzi T, Pieterse A, Fuhrel-Forbis A, Exe N, Kahn V, Ubel P, Feldman-Stewart D, Col N, Fagerlin A. Values Clarification Exercises: A Systematic Review. Presented at Society for Medical Decision Making Annual Meeting, Advanced Designing of Evidence-Based Patient Decision Aids, October 20, 2012. Phoenix, Arizona, USA.
